# Supplementary material
Source: Research Square preprint supplement (doi:10.21203/rs.3.rs-9003553/v1)
Supplement: Supplementary file 1 [file c73acbe3c77a597250da7576.docx]

**SUPPLEMENTARY DOCUMENTS**

| Bacterial species | Viral species | Antimicrobial resistance genes |
| --- | --- | --- |
| - *Acinetobacter Calcoaceticus-Baumannii complex* - *Enterobacter cloacae complex* - *Escherichia coli* - *Haemophilus influenzae* - *Klebsiella aerogenes* - *Klebsiella oxytoca* - *Klebsiella pneumoniae group* - *Moraxella catarrhalis* - *Proteus spp.* - *Pseudomonas aeruginosa* - *Serratia marcescens* - *Staphylococcus aureus* - *Streptococcus agalactiae* - *Streptococcus pneumoniae* - *Streptococcus pyogenes* - *Chlamydia pneumoniae* - *Legionella pneumophila* - *Mycoplasma pneumoniae* | - *Adenovirus* - *Coronavirus* - *Human metapneumovirus* - *Human rhinovirus/enterovirus* - *Influenza A virus* - *Influenza B virus* - *Parainfluenza virus* - *Respiratory syncytial virus* | Carbapenemases   - IMP - KPC - NDM - OXA-48-like - VIM   ESBL   - CTX-M   Methicillin resistance   - *mec*A/C and MREJ (MRSA) |

Table sl 1: BioFire® FilmArray® Pneumonia Plus Testing Panel20

| Pathogen | Female | | Male | |
| --- | --- | --- | --- | --- |
|  | Total | No. of detected pathogens | Total | No. of detected pathogens |
| Strep Pneumonia | 52 | 30,00000 | 72 | 38,00000 |
| | H Influenza | | --- | | 52 | 19,00000 | 72 | 30,00000 |
| | S Aureus | | --- | | 52 | 8,00000 | 72 | 17,00000 |
| | TB | | --- | | 16 | 9,00000 | 21 | 16,00000 |
| | M Catarrhalis | | --- | | 52 | 10,00000 | 72 | 13,00000 |
| | PJP | | --- | | 9 | 11,00000 | 7 | 9,00000 |
| | Rhin/ Entero | | --- | | 51 | 7,00000 | 70 | 8,00000 |
| | Influenza A | | --- | | 52 | 5,00000 | 73 | 7,00000 |
| | A Baumannii | | --- | | 52 | 3,00000 | 72 | 4,00000 |
| | K Pneum | | --- | | 52 | 3,00000 | 72 | 4,00000 |
| | P Aeruginosa | | --- | | 52 | 2,00000 | 72 | 4,00000 |
| | Metapneumovirus | | --- | | 52 | 2,00000 | 72 | 1,00000 |
| | Enterobacter | | --- | | 52 | 1,00000 | 72 | 2,00000 |
| | AdenoVirus | | --- | | 51 | 1,00000 | 70 | 1,00000 |
| | Strep Agalac | | --- | | 52 | 0,00000 | 72 | 2,00000 |
| | Proteus Sp | | --- | | 52 | 0,00000 | 72 | 2,00000 |
| | Myco pneumonia | | --- | | 51 | 1,00000 | 70 | 1,00000 |
| | ParaInfluenza | | --- | | 6 | 0,00000 | 6 | 1,00000 |
| | RSV | | --- | | 51 | 0,00000 | 70 | 1,00000 |
| | Corona virus | | --- | | 52 | 1,00000 | 72 | 0,00000 |
| | E Coli | | --- | | 52 | 0,00000 | 72 | 1,00000 |
| | Chlam | | --- | | 51 | 0,00000 | 70 | 0,00000 |
| | K Oxy | | --- | | 52 | 0,00000 | 72 | 0,00000 |
| | K Aero | | --- | | 52 | 0,00000 | 72 | 0,00000 |
| | S Mareces | | --- | | 52 | 0,00000 | 72 | 0,00000 |
| | Strep Pyo | | --- | | 52 | 0,00000 | 72 | 0,00000 |
| | Inf B | | --- | | 52 | 0,00000 | 73 | 0,00000 |
| | L Pneum | | --- | | 52 | 0,00000 | 73 | 0,00000 |

Table sI 2: Pathogens detected on multiplex PCR (MPPP) based on gender
